# Supplementary material for: Investigating Extracellular DNA Release in Staphylococcus xylosus Biofilm In Vitro
Source: MDPI journal article supplement (doi:10.3390/microorganisms9112192), 2021-10-21
Supplement: s1 [file s1]

**Table S1: Targeted genes of *Staphylococcus xylosus* for the validation of microarray data by qPCR: expression at 24 h and 48 h in biofilm compared with 9 h.**

| Gene Id    | Gene name    | Sequences of primers pairs for qPCR (5'-3') |                               | Mean ratio of expression |      |      |      |
|------------|--------------|---------------------------------------------|-------------------------------|--------------------------|------|------|------|
|            |              |                                             |                               | Microarray               |      | qPCR |      |
|            |              | Forward                                     | Reverse                       | 24 h                     | 48 h | 24 h | 48 h |
| SXYL_01276 | <i>grpE</i>  | CAGGAGGACGATTCAAAAATATC                     | TCTACGCTTATAGTTTCAAATTCAGC    | 3.9                      | 4.8  | 5.6  | 4.7  |
| SXYL_01277 | <i>dnaK</i>  | TTAGGTACAACAAATTCATGTATTGCA                 | GATAGATTGGATTGTATTAGGGTTAGTGA | 3.4                      | 3.7  | 2.7  | 3.6  |
| SXYL_02088 | <i>uvrA</i>  | AGCGTAGATATGTTGAATCATTAAGTG                 | GGTTGCAACAGTAGATCTTGGA        | 3.4                      | 2.6  | 4.8  | 3.1  |
| SXYL_02089 | <i>uvrB</i>  | CGTTAGAGGCGATGTAGTGG                        | ACGTGTTACGAAGTGTGAGG          | 5.2                      | 4.4  | 5.3  | 3.4  |
| SXYL_01796 | <i>uvrC</i>  | CCAAGTTAATTGTTACACGTACAG                    | AACCGGATAAACACATGGTCC         | 3.7                      | 2.1  | 3.2  | 2.1  |
| SXYL_01727 |              | AAGCTGGACACACTGTTGATTTA                     | TTCAACGACTATGTCATATTTCTGC     | 6.7                      | 7.7  | 8.2  | 11.4 |
| SXYL_02505 | <i>katA</i>  | CGTCATCTTCACGAAAGTCATATTC                   | CGCTAGTACACATTATTATCCAAATAG   | 4.2                      | 5.7  | 4.3  | 4.3  |
| SXYL_00366 | <i>cidB</i>  | CTGCCGTAGGCATAGAAGTATC                      | ATTTCATAAGTCAAACCTTTCGC       | 2.1                      | 11.0 | 1.6  | 8.1  |
| SXYL_02535 | <i>ahpF</i>  | AACGCACACCAAGTTTCTCA                        | TTAATGCTTGAACAACGTCAGG        | 4.5                      | 4.4  | 3.6  | 2.7  |
| SXYL_02534 | <i>ahpC</i>  | CCATTCACAGCTAACGCTTATG                      | ACCTTGTAATCTTCTAATTCAGTTGG    | 3.9                      | 4.1  | 3.3  | 2.3  |
| SXYL_01054 |              | GCTCGAGGAATTGGAGGATATC                      | AGAGAATTTAGGGATTTGTCCAGTT     | 10.7                     | 20.2 | 19.9 | 18.1 |
| SXYL_01275 | <i>hrcA</i>  | GTTGTATTCTCATCAGGTCATGTTG                   | GATTTCACAAAAGCATTCAAGTCATT    | 3.8                      | 4.6  | 2.3  | 3.6  |
| SXYL_00784 | <i>czrA</i>  | GGAAGATTCATTTAACGAACAAACG                   | TTGGTGAGAAACGTTAGATTGACT      | 13.8                     | 13.0 | 23.3 | 55.5 |
| SXYL_00837 |              | AACAGTAATCGCATCAACTTTAGC                    | CCTTCTGAACTGGTGCTTCA          | 8.7                      | 13.6 | 51.1 | 29.3 |
| SXYL_00935 | <i>putP2</i> | GCGAGTTGGCAGACTTATATTATG                    | GACCAATACTTCTGCCTCCAA         | 0.4                      | 0.4  | 0.4  | 0.6  |
| SXYL_00326 | <i>copZ</i>  | ATGGCAACTGAAACAATTAAGTAGA                   | TTATTTTACGTCATAACCTTGATCCTCTA | 8.5                      | 10.2 | 12.8 | 13.4 |
| SXYL_01098 | <i>ribE</i>  | TGTTTACAGGAATTGTTGAAGAAATAGG                | CTCTTTCTAAATTCAC TTCAGCAGAT   | 3.2                      | 4.4  | 3.3  | 5.5  |
| SXYL_01318 | <i>gcoPA</i> | GAGCAAGATAAGCAGGAAATGTTAG                   | TGAACGAGAAATCATTGCATCTACTA    | 3.1                      | 2.4  | 7.6  | 2.7  |
| SXYL_01474 | <i>alr2</i>  | ACGCTGAAAAATGTAAAAACAAGACA                  | TGAAGTCGTGCTAAATGTATTAATGC    | 11.9                     | 7.6  | 18.3 | 7.4  |
| SXYL_01548 | <i>guaC</i>  | TGAATGAAGAATTAGCTGAATGGTTC                  | TTTAACGCCTACAGAAATTGATGC      | 2.5                      | 3.0  | 2.3  | 2.9  |
| SXYL_01961 | <i>argG</i>  | TGGTTTAGATACAAGTGTGCA                       | TGCATATGACACGAAATCTTCAC       | 0.2                      | 0.2  | 0.1  | 0.1  |
| SXYL_01974 | <i>mnhE1</i> | CGTCACAGGCAGTTATACATTTAATAA                 | CGGCTCATTATCAATCTTTGGTTT      | 0.4                      | 0.5  | 0.4  | 0.4  |
| SXYL_02548 |              | GCATTAGAATTTGCCGCAATG                       | AGCAGCATACTACCATTTCG          | 7.2                      | 7.5  | 17.1 | 12.0 |
| SXYL_00005 | <i>gyrB</i>  | GAAGATTATGGTGCTGGACAGATA                    | ACGCCATTATCCGTTACTTTAAT       | 2.2                      | 2.1  | 1.5  | 1.3  |
| SXYL_00555 | <i>scrA</i>  | GAAGATAATGTTGAAGCAATGACACA                  | TGAAAACGTTCTTTTACAACATCC      | 0.2                      | 0.3  | 0.2  | 0.3  |
| SXYL_00370 |              | ATGCCAAAAGTATCCTTAGTACCA                    | GCACGTTCATCTTCAATCGTC         | 0.3                      | 0.3  | 0.3  | 0.2  |
| SXYL_00548 |              | GAAGGTGATCCAAC TGAGTTGT                     | ATGCGACCATCTTCATCTTGT         | 7.6                      | 7.3  | 10.9 | 9.1  |
| SXYL_00652 |              | GCAATCGTAGGATTAGATCACGG                     | TACATACCAAGTACATTGTCCTGC      | 6.0                      | 11.0 | 18.7 | 16.0 |
| SXYL_00365 | <i>cidA</i>  | GGCAATGTAATTCAGAGCGTATT                     | AGAAACGACATCCATAACACCAA       | 3.4                      | 16.1 | 3.1  | 15.2 |
